# Supplementary material for: Gene expression profile of epithelial–mesenchymal transition in tumours of patients with nonsmall cell lung cancer: the influence of COPD
Source: PubMed Central journal article supplement — ERJ Open Res. 2022 Jul 18;8(3):00105-2022. doi: 10.1183/23120541.00105-2022 (PMC9289374; doi:10.1183/23120541.00105-2022), 2022-07-18
Supplement: 00105-2022.SUPPLEMENT.pdf [file 00105-2022.SUPPLEMENT.pdf]

1 **ONLINE DATA SUPPLEMENT**

2 **GENE EXPRESSION PROFILE OF EPITHELIAL-MESENCHYMAL**  
3 **TRANSITION IN TUMORS OF PATIENTS WITH NSCLC: THE INFLUENCE**  
4 **OF COPD**

5 **Yingchen Xia<sup>\*</sup>, Jianhua Zha, Víctor Curull, Albert Sánchez-Font, Maria Guitart,**  
6 **Alberto Rodríguez-Fuster, Rafael Aguiló, and Esther Barreiro**

7

## 8 **METHODS**

### 9 **Study population**

10 All patients were prospectively and consecutively recruited from the Lung Cancer  
11 Clinic at Hospital del Mar (Barcelona, Spain). All the patients were part of the *Lung*  
12 *Cancer Mar Cohort*. For this observational investigation, 50 patients with LC were  
13 consecutively recruited during the years 2018-2020. Patients were further subdivided  
14 according to the presence or absence of COPD: n=30 patients with COPD (LC-COPD  
15 group) and n=20 patients with no COPD (LC control group).

16 In all cases, pre-operative staging was performed using chest and upper abdomen  
17 Computed Tomography (CT) scan and fluoro-deoxy-glucose positron emission  
18 tomography/computed tomography (PET) body-scan. When suspected mediastinal  
19 lymph-node involvement, a fiberoptic bronchoscopy with endo-bronchial ultra-sound  
20 (EBUS) and trans-tracheal biopsy of the suspected nodes were performed. In case of  
21 negative results, a surgical exploration of the mediastinum: cervical video-assisted  
22 mediastinal lymphadenectomy (VAMLA) and/or anterior mediastinotomy were  
23 performed, the latter depending on the location of the suspected nodes.  
24 Notwithstanding, in all surgical cases, intra-operative systematic hilar and mediastinal  
25 lymphadenectomy (at least, ipsilateral paratracheal, subcarinal, and ipsilateral  
26 pulmonary ligament) was performed as previously recommended [1,2].

27 Standard clinical guidelines were used to establish the selection of patients and  
28 contraindications for thoracic surgery as previously described [2]. Decisions on the best  
29 therapeutic approach were always made during the weekly meetings of the  
30 Multidisciplinary Lung Cancer Committee. Candidates for tumor resection underwent  
31 pulmonary surgery (video-assisted thoracoscopic surgery, VATS) prior to  
32 administration of any sort of adjuvant therapy. LC diagnosis and staging were

33 established by histological confirmation and classified according to currently available  
34 guidelines for the diagnosis and management of LC [3,4]. TNM (tumor, node, and  
35 metastasis) staging was defined as stated in the 8<sup>th</sup> edition Lung Cancer Stage  
36 Classification [5].

37 Exclusion criteria were: small cell lung cancer (SCLC), chronic cardiovascular disease,  
38 metabolic or clot system disorders, signs of severe inflammation and/or bronchial  
39 infection (bronchoscopy), current or recent invasive mechanical ventilation, or long-  
40 term oxygen therapy. The presence/absence of these diseases was confirmed using  
41 standard clinical tests: exercise capacity electrocardiogram, clinical examination, blood  
42 tests, bronchoscopy and echocardiography.

43 This was a prospective controlled **clinical** investigation, in which the World Medical  
44 Association guidelines for research on human beings (Seventh revision of Declaration  
45 of Helsinki, Fortaleza, Brazil, 2013) were followed. The institutional Ethics Committee  
46 on Human investigations (protocol #2008/3390 /I, February 4<sup>th</sup> 2008, at Hospital del  
47 Mar-IMIM, Barcelona, Spain) approved all the procedures and study protocol. All  
48 patients invited to participate in the study signed their written informed consent.

#### 49 **Clinical assessment**

50 In all patients, lung function parameters were assessed following standard procedures.  
51 Diagnosis and severity of patients with COPD were determined according to currently  
52 available guidelines [5,6]. Nutritional evaluation included the assessment of body mass  
53 index (BMI) and nutritional blood parameters from all the patients.

#### 54 **Sample collection and preservation**

55 Lung samples were obtained from tumors following standard technical procedures  
56 during VATS in the surgery room. The fresh samples were carefully transported to the  
57 Pathology Department, located at a very short distance (less than 5 minutes). In all

58 patients, the expert pulmonary pathologists selected tumor lung specimens of  
59 approximately 10x10 mm<sup>2</sup> area from the fresh samples. For all the recruited patients,  
60 fragments of tumor specimens were immediately snap-frozen and stored at -80°C until  
61 further use in the laboratory experiments. As patients were recruited consecutively,  
62 sample collection procedures were equally applied to all. In the same vein, non-tumor  
63 specimens were also collected as far distal to the tumor margins as possible (average >7  
64 cm). Fragments of non-tumor specimens were also immediately snap-frozen and stored  
65 at -80°C until further use. The pathologists were not aware of the presence or absence of  
66 COPD in the study patients. Thus, no differences in sample preservation were applied  
67 between LC and LC-COPD patients. Driver mutations were analyzed by the  
68 pathologists on the tumor specimens of all the study patients. Pilot experiments were  
69 conducted in order to test whether any differences were observed in non-tumor samples  
70 between LC-COPD and LC control patients. No significant differences were observed  
71 in non-tumor samples between LC-COPD and LC patients. Thus, for the sake of clarity  
72 the results obtained from the tumor samples in both study groups are the ones depicted  
73 in the figures.

#### 74 **Biological experiments**

75 **Figure 1 illustrates the flow of the signaling markers analyzed in the investigation. The**  
76 **sequence of experiments and results description follow this chart.** *SMAD4* can form  
77 homologous complexes by itself or heterologous complexes with other activating  
78 SMAD family members, translocate to the nucleus, and act synergistically with other  
79 transcription factors to affect the EMT pathway [7,8]. *ZEB2* inhibits the expression of  
80 E-cadherin, activates matrix metalloproteinases (MMP), induces the occurrence of  
81 EMT, and promotes cell proliferation and migration [9,10]. In EMT pathway, increased  
82 expression of *CDH2*, a downstream protein of Twist1, may render tumor cells more

83 aggressive [11,12]. The most important function of Snail1 is to induce EMT in tumor  
84 cells by inhibiting the transcription of E-cadherin, while favoring the expression of *VIM*  
85 [13]. Cells with low expression of *ICAM1* or *MMP9* will enter EMT [14,15].

86 *RNA isolation.* RNA was isolated from 30-50 microgram frozen tumor samples using  
87 500 microL TRIzol reagent (Cat. 15596026, Thermo Fisher Scientific, Waltham, MA,  
88 USA). After incubation of the samples at room temperature for 10 minutes to achieve  
89 complete dissociation of nucleoprotein complexes, 200 microL chloroform were added,  
90 and samples were then centrifuged at 13,500 rpm at 4°C for 15 minutes. The aqueous  
91 phase was recovered and the RNA was precipitated with 600 microL isopropanol.  
92 Subsequently, samples were incubated at 4°C for 30 minutes and were then cooled  
93 down to -20°C overnight. After thawing the samples at room temperature, they were  
94 centrifuged at 13,500 rpm at 4°C for 10 minutes, and the supernatant was removed. The  
95 remaining pellet was then washed using one mL solution of 75% ethanol to be  
96 subsequently centrifuged at 9,000 rpm at 4°C for five minutes. The RNA containing  
97 pellet was air-dried for 30 minutes and was then dissolved in 20 microL RNase-free  
98 water. To assess the quality and purity of the isolated RNA, concentrations of total  
99 RNA were determined using NanoDrop 1000 (Thermo Fisher Scientific, Waltham, MA,  
100 USA) according to the manufacturer's instructions.

101 *RNA reverse transcription (RT).* Invitrogen® cDNA Synthesis Kit (Cat.18018044,  
102 Thermo Fisher Scientific, Carlsbad, CA, USA) was used to prepare cDNA templates  
103 following the manufacturer's instructions. Total RNA isolated samples were  
104 manipulated to add oligo (dT), dNTP mix, DTT, reverse transcriptase and buffer.  
105 Initially, 20 microL reaction mix (4 microL buffer, 1 microL 0.1 M DTT, 1 microL  
106 reverse transcriptase and 1 microL oligo (DT), 1 microL dNTP mix, 12 microL RNase-  
107 free water) was mixed with 100 nanogram of each sample for all the samples and

108 singlets. The mixture was then incubated in a thermal cycler (Biometra Tone 96,  
109 Analytik Jena, Jena, Germany) to perform the synthesis reaction at 50°C for 60 minutes.  
110 This step was followed by incubation at 70°C for 15 minutes to stop the reaction and  
111 samples were finally kept at -80°C up until the performance of the real-time polymerase  
112 chain reaction (PCR) procedures.

113 *Quantitative real time-PCR amplification (qRT-PCR)*. Real-time PCR was performed  
114 using commercially gene expression assays for human studies. The probes  
115 corresponding to the following genes involved in signaling of EMT were detected:  
116 SMAD family member 3 (*SMAD3*, Hs00969210\_m1, Life Technologies), SMAD  
117 family member 4 (*SMAD4*, Hs00929647\_m1, Life Technologies), zinc finger E-box  
118 binding homeobox 2 (*ZEB2*, Hs00207691\_m1, Life Technologies), twist family  
119 transcription factor 1 (*TWIST1*, Hs00361186\_m1, Life Technologies), snail family  
120 transcriptional repressor 1 (*SNAIL1*, Hs00195591\_m1, Life Technologies), intercellular  
121 adhesion molecule 1 (*ICAM1*, Hs00164932\_m1, Life Technologies), vimentin (*VIM*,  
122 Hs00185584\_m1, Life Technologies), cadherin-2 (*CDH2*, Hs00983056\_m1, Life  
123 Technologies), matrix metalloproteinase 1 (*MMP-1*, Hs00899658\_m1, Life  
124 Technologies), matrix metalloproteinase 9 (*MMP-9*, Hs00957562\_m1, Life  
125 Technologies) and glyceraldehyde-3-phosphate dehydrogenase (*GAPDH*,  
126 Hs99999905\_m1, Life Technologies). As previously described [16], *GAPDH* was used  
127 as an exogenous control in order to normalize the RNA amplification in all the study  
128 samples. Samples from both groups of patients were always run simultaneously in  
129 duplicates for comparison purposes. Briefly, 4.5 microL of the resulting cDNA samples  
130 were mixed with 0.5 microL of each specific probe and 5 microL Taqman universal  
131 master mix no AmpErase UNG<sup>TM</sup> (Cat. 4440044, Thermo Fisher Scientific). The  
132 samples were run in a thermal cycler (QuantStudio Real-time PCR system, Thermo

133 Fisher Scientific). The first step was the enzyme activation, achieved at 95°C for 20  
134 seconds and was followed by 40 combined cycles of denaturation (95°C for one  
135 second), and final annealing (60°C for 20 seconds) as also previously described in  
136 studies assessing gene expression of EMT markers [16,17]. As duplicates from all the  
137 patient samples were run, the average value was calculated for each marker in each  
138 patient. Two replicas of these experiments were performed for all the target genes. No  
139 expression could be detected for a few of the patients despite the sample duplicates and  
140 the replicas of the experiments. Patients with no expression have been represented as no  
141 expression samples in a separate table in the results section. Appropriate statistical  
142 analyses have been conducted in order to assess potential differences in the number of  
143 no-expression samples between the two study groups. The results obtained from the  
144 experiments were collected and analyzed using the Expression Suite Software version  
145 1.0.4 from Applied Biosystems (Thermo Fisher Scientific), in which the comparative  
146 CT method ( $2^{-\Delta\Delta CT}$ ) for relative quantification was used as also previously described  
147 [18].

#### 148 **Statistical analysis**

149 Sample size was calculated on the basis of four target markers (*CDH2*, *ZEB2*, *SMAD4*,  
150 and *SMAD3*). Accepting an alpha risk of 0.05 and a beta risk of 0.2 in a two-sided test:  
151 16, 16, 13, and 16 subjects were required in each group to identify a statistically  
152 significant difference greater than or equal to 0.5, 2, 1.7, and 3 units in the mean value  
153 and a standard deviation of 0.5, 2, 1.5, and 3 in the expression of the genes *CDH2*,  
154 *ZEB2*, *SMAD4*, and *SMAD3*, respectively. As 30 and 20 patients were included in LC-  
155 COPD and LC control group of patients, the total number of patients was sufficient to  
156 attain an 80% power.

157 The normality of the study variables was examined using the Shapiro-Wilk test. For an  
158 initial descriptive analysis of clinical parameters, qualitative variables were described as  
159 frequencies (number and percentage) and quantitative variables as mean and standard  
160 deviation. Differences between LC and LC-COPD and between smokers and never-  
161 smokers as a whole (with no distinction between COPD and non-COPD patients) were  
162 assessed using Student's T-test. Chi-square test was used to assess differences between  
163 the two groups for the categorical variables including the driver mutations and  
164 expression or no gene expression for the markers: *SMAD3*, *SMAD4*, *ZEB2*, *TWIST1*,  
165 *SNAIL*, *ICAM1*, *VIM* and *CDH2*, *MMP1*, *MMP9*.

166 Potential correlations between clinical and biological variables were explored using the  
167 Pearson's correlation coefficient. All the statistical analyses were performed using the  
168 Statistical Package for the Social Sciences (Portable SPSS, PASW statistics 22.0  
169 version for Windows, SPSS Inc., Chicago, IL, USA). Correlations are displayed in  
170 graphical correlation matrixes, obtained from R package corrplot ([https://cran.r-](https://cran.r-project.org/web/packages/corrplot/index.html)  
171 [project.org/web/packages/corrplot/index.html](https://cran.r-project.org/web/packages/corrplot/index.html)), in different colors: blue for positive  
172 correlations and red for negative ones. Statistical significance was established at  $p \leq$   
173 0.05 for all the comparisons.

174

175



176 **Figure S1**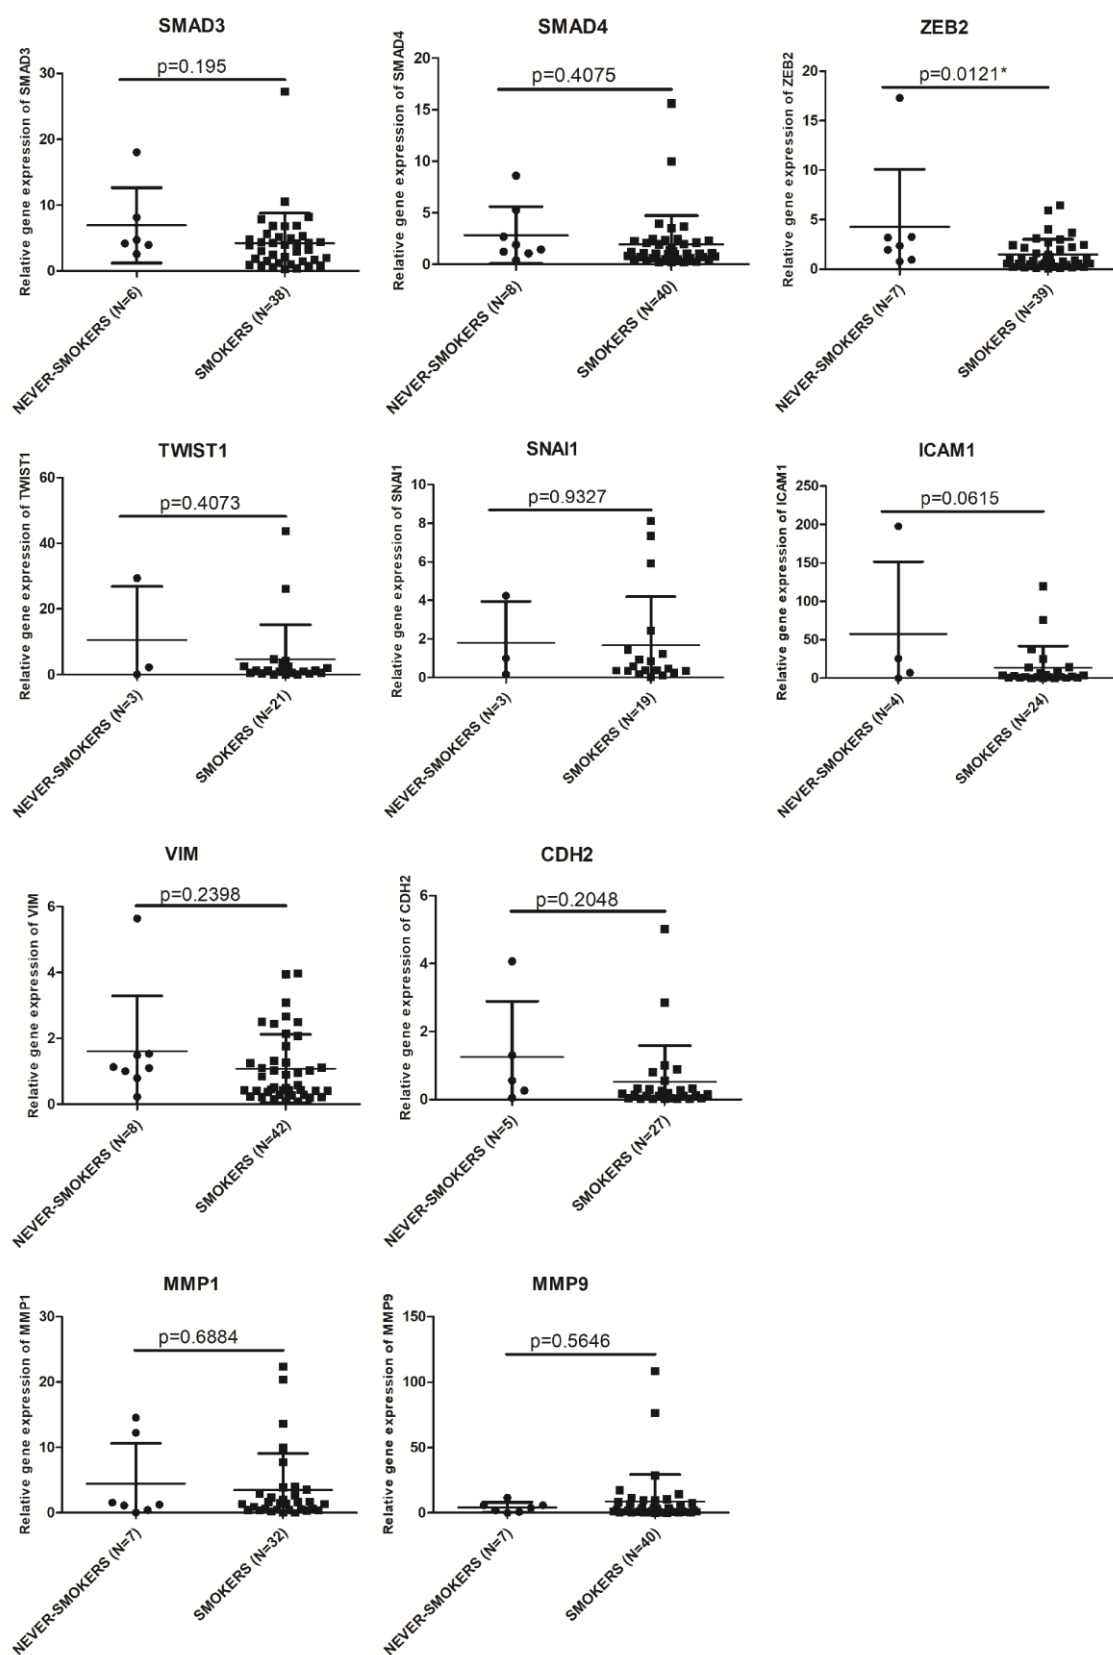

177

178 **Figure S1.** Gene expression of EMT markers (*SMAD3*, *SMAD4*, *ZEB2*, *TWIST1*,  
 179 *SNAI1*, *ICAM1*, *VIM*, *CDH2*, *MMP1*, *MMP9*) between never smokers and smokers in

180 the overall patients (n=50). Student's t test was used to assess potential significant  
181 differences, \*P < .05.

182

183

184

185 **Figure S2**

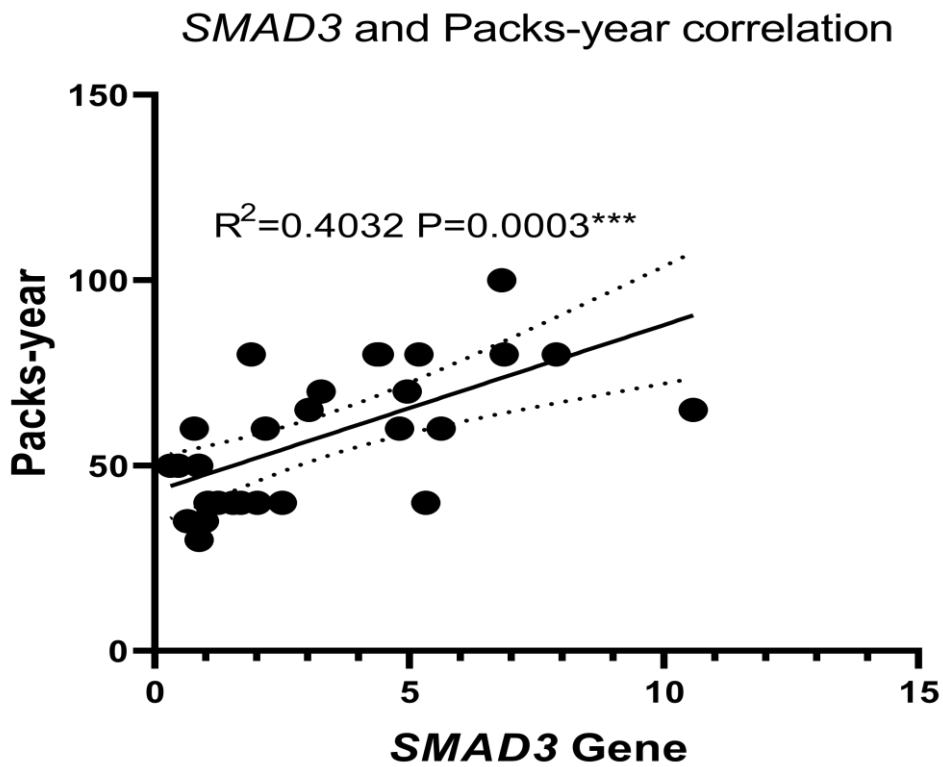

186

187

188 **Figure S2.** Linear regression plot between *SMAD3* expression and the number of packs-  
189 years among LC-COPD patients. *SMAD3* gene expression for each patient is  
190 represented in the X-axis, while the number of packs-year is represented in the Y-axis.  
191 Twenty-eight patients are represented, since two patients did not show any expression  
192 of *SMAD3* in their lung tumors.

193

194

195

196

197

198

199

200

201   **REFERENCES**

- 202   1.    Justyna W. Epithelial-Mesenchymal Plasticity: A central regulator of cancer  
203    progression. *Physiol. Behav.* 2017; 176: 139–148.
- 204   2.    Armstrong P, Congleton J, Fountain SW, et al. Guidelines on the selection of  
205    patients with lung cancer for surgery. *Thorax* 2001; 56: 89–108.
- 206   3.    De leyn P, Doooms C, Kuzdzal J, et al. Revised ests guidelines for preoperative  
207    mediastinal lymph node staging for non-small-cell lung cancer. *Eur. J. Cardio-  
208    thoracic Surg.* 2014; 45: 787–798.
- 209   4.    Slatore CG, Horeweg N, Jett JR, et al. An Official American Thoracic Society  
210    research statement: A research framework for pulmonary nodule evaluation and  
211    management. *Am. J. Respir. Crit. Care Med.* 2015; 192: 500–514.
- 212   5.    Detterbeck FC, Boffa DJ, Kim AW, et al. The Eighth Edition Lung Cancer Stage  
213    Classification. *Chest* Elsevier; 2017; 151: 193–203.
- 214   6.    Soler-Cataluña JJ, Piñera P, Trigueros JA, et al. Spanish COPD Guidelines  
215    (GesEPOC) 2021 Update Diagnosis and Treatment of COPD Exacerbation  
216    Syndrome. *Arch. Bronconeumol. (English Ed.* Elsevier; 2021; .
- 217   7.    Dardare J, Witz A, Merlin JL, et al. SMAD4 and the TGFB pathway in patients  
218    with pancreatic ductal adenocarcinoma. *Int. J. Mol. Sci.* 2020; 21.
- 219   8.    Cicenas J, Kvederaviciute K, Meskinyte I, et al. KRAS, TP53, CDKN2A,  
220    SMAD4, BRCA1, and BRCA2 mutations in pancreatic cancer. *Cancers (Basel).*  
221    2017; 9.
- 222   9.    Sánchez-Tilló E, Siles L, de Barrios O, et al. Expanding roles of ZEB factors in  
223    tumorigenesis and tumor progression. *Am. J. Cancer Res. Am J Cancer Res*;  
224    2011; 1: 897–912.
- 225   10.   Vandamme N, Denecker G, Bruneel K, et al. The EMT Transcription Factor  
226    ZEB2 Promotes Proliferation of Primary and Metastatic Melanoma While  
227    Suppressing an Invasive, Mesenchymal-Like Phenotype. *Cancer Res. Cancer  
228    Res*; 2020; 80: 2983–2995.
- 229   11.   Na YR, Lee JS, Lee SJ, et al. Interleukin-6-induced Twist and N-cadherin  
230    enhance melanoma cell metastasis. *Melanoma Res. Melanoma Res*; 2013; 23:  
231    434–443.
- 232   12.   Chaves LP, Melo CM, Saggiaro FP, et al. Epithelial-Mesenchymal Transition  
233    Signaling and Prostate Cancer Stem Cells: Emerging Biomarkers and  
234    Opportunities for Precision Therapeutics. *Genes (Basel).* *Genes (Basel)*; 2021;  
235    12.
- 236   13.   Tang X, Sui X, Weng L, et al. SNAIL1: Linking Tumor Metastasis to Immune  
237    Evasion. *Front. Immunol. Frontiers Media SA*; 2021; 12.
- 238   14.   Santarosa M, Maestro R. The Autophagic Route of E-Cadherin and Cell  
239    Adhesion Molecules in Cancer Progression. *Cancers (Basel).* *Cancers (Basel)*;  
240    2021; 13: 6328.

- 241 15. Nowak E, Bednarek I. Aspects of the Epigenetic Regulation of EMT Related to  
242 Cancer Metastasis. *Cells* Cells; 2021; 10: 3435.
- 243 16. Paradowska-Gorycka A, Wajda A, Romanowska-Próchnicka K, et al. Th17/Treg-  
244 Related Transcriptional Factor Expression and Cytokine Profile in Patients With  
245 Rheumatoid Arthritis. *Front. Immunol.* Frontiers Media S.A.; 2020; 11.
- 246 17. Ma L, Andrieu T, McKinnon B, et al. Epithelial-to-mesenchymal transition  
247 contributes to the downregulation of progesterone receptor expression in  
248 endometriosis lesions. *J. Steroid Biochem. Mol. Biol.* Elsevier Ltd; 2021; 212:  
249 105943.
- 250 18. Livak KJ, Schmittgen TD. Analysis of Relative Gene Expression Data Using  
251 Real-Time Quantitative PCR and the  $2^{-\Delta\Delta CT}$  Method. *Methods* Academic Press  
252 Inc.; 2001; 25: 402–408.
- 253
